# Supplementary material
Source: PubMed Central journal article supplement (PMC8322416)
Supplement: 41423_2021_717_MOESM1_ESM.pdf [file 41423_2021_717_MOESM1_ESM.pdf]

Supplementary Table 1: Comparison of NetMHCIIpan-4.0 prediction to empirical data

| No  | Pos | Seq                | Computational (100-%Rank) |             | Empirical (%competition) |              | BA vs RIPPA |          | EL vs RIPPA |          | BA+EL vs RIPPA |                  | ELISA vs RIPPA |             | IC50vHA306-318 | Comments               |
|-----|-----|--------------------|---------------------------|-------------|--------------------------|--------------|-------------|----------|-------------|----------|----------------|------------------|----------------|-------------|----------------|------------------------|
| No  | Pos | Seq                | 100-%RankB                | 100-%RankEL | RIPPA (Flow)             | sDR4 (ELISA) | RIPPA false | BA false | RIPPA false | EL false | RIPPA false    | Prediction false | RIPPA false    | ELISA false | IC50           | Comments               |
| 4   | 22  | TQLPPAYTNSFTRGVYY  | 77.93                     | 81.67       | 61.4352688               | 71.8123111   |             | 1        |             | 1        |                | 1                |                |             |                | binder                 |
| 5   | 29  | TNSFTRGVYYPDKVFRS  | 96.34                     | 93.44       | 68.2588881               | 80.2509847   |             |          |             |          |                |                  |                |             |                | binder                 |
| 6   | 36  | VYYPDKVFRSSVLHSTQ  | 97.94                     | 91.04       | 71.8359318               | 91.8338371   |             |          |             |          |                |                  |                |             |                | binder                 |
| 8   | 50  | STQDLFLPFFSNVTWFH  | 96.65                     | 75.36       | 0                        | 26.4999542   |             | 1        |             |          |                |                  |                |             |                | non-binder             |
| 9   | 57  | PPFSNVTWFHAIHVSQT  | 95.27                     | 63.91       | 3.6033938                | 34.9821379   |             | 1        |             |          |                |                  |                |             |                | non-binder             |
| 10  | 64  | WFHAIHVSQTNGTKRFD  | 94.55                     | 93.9        | 74.4633008               | 70.3993771   |             |          |             |          |                |                  |                |             |                | binder                 |
| 13  | 85  | PFNDGVYFASTEKSNII  | 95.54                     | 98.94       | 75.3388373               | 67.2666483   |             |          |             |          |                |                  |                |             |                | strong binder          |
| 15  | 99  | NIIRGWIFGTTLDLSTQ  | 96.11                     | 95.52       | 80.624436                | 76.1198131   |             |          |             |          |                |                  |                |             |                | strong binder          |
| 17  | 113 | KTQSLILVNNATNVVVK  | 99.16                     | 91.99       | 0                        | 0.6938719    |             | 1        |             | 1        |                |                  |                |             | tested         | non-binder             |
| 21  | 141 | LGVYYHKNKNSWMESEF  | 83.4                      | 73.47       | 78.8901171               | 72.3619126   |             | 1        |             | 1        |                |                  |                |             | tested         | binder                 |
| 23  | 155 | SEFRVYSSANNCTFEYV  | 97.08                     | 74.95       | 7.93650794               | 26.7289548   |             | 1        |             |          |                |                  |                |             |                | non-binder             |
| 25  | 169 | EYVSQPFMLDLEKQGN   | 77.5                      | 92.03       | 63.8703408               | 79.5685628   |             | 1        |             |          |                |                  |                |             |                | binder                 |
| 29  | 197 | IDGYFKIYSKHTPINLV  | 90.51                     | 85          | 0                        | 15.6773839   |             | 1        |             |          |                |                  |                |             |                | non-binder             |
| 30  | 204 | YSKHTPINLVRDLPQGF  | 86.29                     | 94.72       | 51.2287105               | 75.4648713   |             | 1        |             |          |                |                  |                |             |                | binder                 |
| 34  | 232 | GINITRFQTLALHRSY   | 98.75                     | 92.54       | 58.410649                | 67.4344186   |             |          |             |          |                |                  |                |             |                | binder                 |
| 35  | 239 | QTLALHRSYLTPGDSS   | 84.13                     | 53.11       | 63.6121879               | 56.5951259   |             | 1        |             | 1        |                |                  |                |             |                | binder                 |
| 40  | 274 | TFLLYNENGTITDAVD   | 86.1                      | 90.7        | 27.7886652               | 52.0289457   |             |          |             |          |                |                  |                |             |                | weak binder/non-binder |
| 41  | 281 | ENGTITDAVDCALDPLS  | 37.79                     | 58.56       | 57.8167308               | 25.5335715   | 1           |          | 1           |          | 1              |                  | 1              |             |                | non-binder             |
| 44  | 302 | TLKSFTVEKGIYQTSNF  | 95.98                     | 97.15       | 87.7169907               | 89.1590247   |             |          |             |          |                |                  |                |             |                | strong binder          |
| 45  | 309 | EKGIYQTSNFRVQPTES  | 83.09                     | 86.9        | 61.2305843               | 76.1312632   |             | 1        |             | 1        |                |                  |                |             |                | binder                 |
| 46  | 316 | SNFRVQPTESIVRFPNI  | 99.03                     | 95.98       | 61.452514                | 84.986718    |             |          |             |          |                |                  |                |             |                | strong binder          |
| 50  | 344 | ATRFASVYAWNRKRISN  | 91.5                      | 74.24       | 0                        | 17.149858    |             | 1        |             |          |                |                  |                |             |                | non-binder             |
| 52  | 358 | ISNCVADYSVLYNSASF  | 97.12                     | 91.96       | 61.169175                | 91.439956    |             |          |             |          |                |                  |                |             |                | strong binder          |
| 53  | 365 | YSVLYNSASFSTFKCYG  | 93.06                     | 46.52       | 0                        | 35.2294586   |             | 1        |             |          |                |                  |                |             |                | non-binder             |
| 57  | 393 | TNVYADSFVIRGDEVRO  | 73.89                     | 90.55       | 74.3406826               | 86.5828524   |             | 1        |             |          |                |                  |                |             |                | strong binder          |
| 62  | 428 | DFTGCVIAWNSNLDLSD  | 93.58                     | 92.87       | 0                        | 35.6279198   |             | 1        |             |          |                |                  |                |             |                | non-binder             |
| 67  | 463 | PFERDISTEIQAGSTP   | 72.19                     | 65.58       | 74.8431367               | 62.041232    |             | 1        |             | 1        |                |                  |                |             | tested         | weak binder            |
| 68  | 470 | TEIQAGSTPCNGVEGF   | 68.56                     | 81.88       | 85.4190191               | 79.270862    |             | 1        |             | 1        |                |                  |                |             |                | strong binder          |
| 70  | 484 | EGFNCFPLQSYGFQPT   | 72.79                     | 58.57       | 58.2807658               | 72.9815759   |             | 1        |             | 1        |                |                  |                |             |                | binder                 |
| 71  | 491 | PLQSYGFQPTNGVGYQP  | 91.79                     | 98.8        | 90.203137                | 94.7787854   |             |          |             |          |                |                  |                |             |                | strong binder          |
| 74  | 512 | VLSFELLHAPATVCGPK  | 93.76                     | 80.54       | 63.1536595               | 75.6358441   |             |          |             | 1        |                |                  |                |             | tested         | strong binder          |
| 83  | 575 | AVRDPQTLLEILITPCS  | 56.5                      | 48.44       | 54.9343159               | 60.4882294   |             | 1        |             | 1        |                |                  |                |             |                | weak binder            |
| 84  | 582 | LEILDITPCSFQGVSVI  | 54.62                     | 9.87        | 60.6553144               | 46.8306311   |             | 1        |             | 1        |                |                  |                |             |                | weak binder            |
| 88  | 610 | VLYQDVNCTEVPVAIHA  | 63.52                     | 77.88       | 63.6406444               | 53.2838692   |             | 1        |             | 1        |                |                  |                |             |                | weak binder            |
| 90  | 624 | IHADQLTPTRVYSTGS   | 59.82                     | 37.46       | 59.2785919               | 29.7426033   | 1           |          | 1           |          | 1              |                  |                | 1           |                | non-binder/weak binder |
| 91  | 631 | PTWRVYSTGSNVFQTRA  | 97.64                     | 92.63       | 56.3157161               | 67.4758341   |             |          |             |          |                |                  |                |             |                | binder                 |
| 93  | 645 | TRAGCLIGAEHVNNSEYE | 65.31                     | 86.93       | 87.0401274               | 59.4899093   |             | 1        |             | 1        |                |                  |                |             | tested         | binder                 |
| 94  | 652 | GAEHVNNSEYCDIPIGA  | 54.09                     | 72.2        | 70.6229467               | 0            | 1           |          | 1           |          | 1              |                  |                |             | tested         | non-binder             |
| 96  | 666 | IGAGICASYQTQTNNSPR | 58.48                     | 49.66       | 56.9619623               | 5.4781777    | 1           |          | 1           |          | 1              |                  |                |             |                | non-binder             |
| 99  | 687 | VASQSIIAYTMLGAEN   | 94.97                     | 87.97       | 89.7061174               | 92.5010982   |             |          |             |          |                |                  |                |             | tested         | strong binder          |
| 100 | 694 | AYTMLGAENSVAYSNN   | 91.72                     | 75.54       | 60.3482817               | 54.46877     |             |          |             | 1        |                |                  |                |             |                | binder                 |

|     |      |                     |       |       |            |            |   |   |   |  |   |  |   |                        |
|-----|------|---------------------|-------|-------|------------|------------|---|---|---|--|---|--|---|------------------------|
| 101 | 701  | AENSVAYSNNNSIAIPTN  | 92.02 | 95.16 | 81.3993624 | 41.0062276 |   |   |   |  |   |  | 1 | binder                 |
| 103 | 715  | PTNFTISVTEILPVSM    | 93.71 | 87.72 | 76.6549648 | 71.1284529 |   | 1 |   |  |   |  |   | binder                 |
| 106 | 736  | VDC'TMYICGDS'FECSNL | 55.33 | 56.64 | 71.3851967 | 31.8483682 | 1 |   | 1 |  | 1 |  | 1 | non-binder/weak binder |
| 108 | 750  | SNLLQYGSFCTQLNRA    | 85.97 | 51.66 | 67.1329343 | 2.7158325  | 1 |   | 1 |  | 1 |  | 1 | non-binder             |
| 109 | 757  | GSFCTQLNRALTGIAVE   | 94.34 | 50.92 | 85.9082099 | 86.2037779 |   |   | 1 |  |   |  |   | strong binder          |
| 110 | 764  | NRALTGIAVEQDKNTQE   | 57.65 | 92.11 | 41.6959337 | 17.4085406 |   |   | 1 |  |   |  |   | non-binder             |
| 115 | 799  | GFNFSQILPDPSPSKR    | 95.51 | 99.08 | 78.9364026 | 79.2216853 |   |   |   |  |   |  |   | strong binder          |
| 122 | 848  | DLICAKFNGLTVLPPL    | 94.32 | 73.22 | 3.0559766  | 0          | 1 |   |   |  |   |  |   | non-binder             |
| 128 | 890  | AGAALQIPFAMQMAYRF   | 92.34 | 31.21 | 44.0454506 | 1.2480943  | 1 |   |   |  |   |  |   | non-binder             |
| 129 | 897  | PFAMQMAYRFNGIGVTQ   | 93.09 | 60.87 | 0          | 0          | 1 |   |   |  |   |  |   | non-binder             |
| 132 | 918  | ENQKLIANQFNSAIGKI   | 96.2  | 87.79 | 79.1782757 | 41.4274271 |   |   | 1 |  | 1 |  | 1 | weak binder            |
| 133 | 925  | NQFNSAIGKIQDLSLST   | 79.18 | 86.87 | 80.2636166 | 20.5483346 | 1 |   | 1 |  | 1 |  | 1 | weak binder            |
| 134 | 932  | GKIQDLSLSTASALGKL   | 90.72 | 90.4  | 91.6756734 | 94.340939  |   |   |   |  |   |  |   | strong binder          |
| 138 | 960  | NTLVKQLSSNFGAIVSV   | 93.35 | 87.99 | 81.5863751 | 75.224166  |   |   | 1 |  |   |  |   | strong binder          |
| 139 | 967  | SSNFGAIVSVLNDILSR   | 97.63 | 88.04 | 71.9691514 | 28.2048632 |   |   | 1 |  | 1 |  | 1 | weak binder            |
| 144 | 1002 | OSLQTYVVTQQLIRAAET  | 97.2  | 91.7  | 81.3095383 | 93.1135171 |   |   |   |  |   |  |   | strong binder          |
| 145 | 1009 | TQQLIRAAEIRASANLA   | 95.94 | 89.62 | 53.1983002 | 51.266312  |   |   | 1 |  |   |  |   | weak binder            |
| 146 | 1016 | AEIRASANLAATKMSEC   | 99.15 | 94.83 | 81.8672874 | 82.624874  |   |   |   |  |   |  |   | strong binder          |
| 150 | 1044 | GKGYHLMSFPQSAPHGV   | 91.29 | 84.77 | 49.3835201 | 24.3055376 | 1 |   |   |  |   |  |   | non-binder             |
| 152 | 1058 | HGVVFLHVTYVPAQEKV   | 94.08 | 93.25 | 62.0561464 | 31.5201943 |   |   |   |  |   |  | 1 | weak binder            |
| 154 | 1072 | EKNFTTAPAICHDKGAH   | 92.68 | 90.41 | 41.3924826 | 10.4963953 | 1 |   | 1 |  | 1 |  | 1 | non-binder             |
| 157 | 1093 | GVFVSNQTHWFVTQRNF   | 91.54 | 58.47 | 54.5194471 | 38.2568025 |   |   |   |  |   |  |   | weak binder            |
| 158 | 1100 | THWFVTQRNFYEPQIIT   | 97.8  | 94.92 | 64.9437324 | 93.4778676 |   |   |   |  |   |  |   | binder                 |
| 160 | 1114 | IITDNTFVSGNCDVVI    | 65.75 | 56.61 | 57.2028519 | 10.9020905 | 1 |   | 1 |  | 1 |  | 1 | non-binder             |
| 165 | 1149 | KEELDKYFKNHTSPDVD   | 80.45 | 95.49 | 31.951954  | 20.2640895 |   |   | 1 |  |   |  | 1 | non-binder             |
| 177 | 1233 | MLCCMTSCSCSLKCCS    | 37.39 | 5     | 61.8346859 | 16.3854363 | 1 |   | 1 |  | 1 |  | 1 | non-binder             |
| 180 | 1254 | CKFDEDDSEPVLKGVKL   | 35.84 | 75.5  | 69.1776149 | 60.7199152 |   | 1 | 1 |  | 1 |  | 1 | weak binder            |

False identification side-by-side (counts)

False identification side-by-side (%)

8 29 8 27 8 17 6 5  
4.4198895 16.0221 4.4198895 14.917 4.41989 9.392265193 3.3149171 2.762431

|                                    |           |             |            |            |
|------------------------------------|-----------|-------------|------------|------------|
| Potential false positives (counts) | 13        | 5           | 8          | 0          |
| Potential false negatives (count)  | 17        | 23          | 1          | 7          |
| Potential false positives (%)      | 7.1823204 | 2.762430939 | 4.4198895  | 0          |
| Potential false negatives (%)      | 9.3922652 | 12.70718232 | 0.55248619 | 3.86740331 |
| False identification (counts)      | 30        | 28          | 9          | 7          |
| False identification (FDR)         | 16.574586 | 15.46961326 | 4.97237569 | 3.86740331 |

This number assumes ELISA identifies the rest 113 peptides as non-binder

18 agreements (red/pink fill), 50 disagreements between prediction and yeast display. The rest 113 non-binders were not evaluated by capture ELISA.

In the capture ELISA, 1 uM Bio-HA306-318 and 40 uM of a competitor peptide were used

Means of at least three independent experiments are shown
